# Supplementary material for: Recirculation Flow and Pressure Distributions in a Rayleigh Step Bearing
Source: Hindawi journal article supplement (doi:10.1155/2018/9480636), 2018-06-21
Supplement: f1 [file 9480636.f1.pdf]

## Supplementary materials:

### Recirculation Flow and Pressure Distributions in a Rayleigh Step Bearing

Feng Shen, Cheng-Jin Yan, Jian-Feng Dai, and Zhao-Miao Liu

*College of Mechanical Engineering and Applied Electronics Technology & Institute for Advanced Mechanics in Engineering, Beijing University of Technology, Beijing 100124, P. R. China*

*Correspondence should be addressed to Zhao-Miao Liu: lzm@bjut.edu.cn*

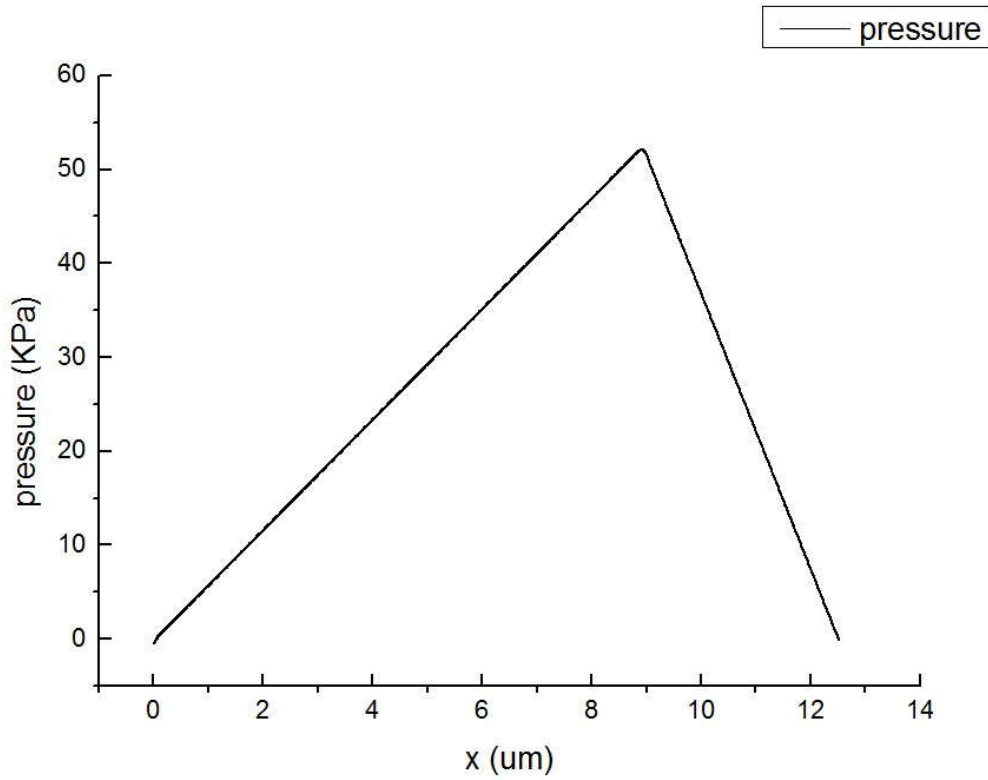

FIGURE 1: FLUENT results of pressure distributions on lower surfaces under the same conditions of that in Figure 2(a), finding the deviation of the maximum pressure  $p_m$  is 2.4%.

( $h_1=250\mu\text{m}$ ,  $L=12.5\text{mm}$ ,  $h_2=133.976\mu\text{m}$ ,  $l_1=8.975\text{mm}$ ,  $U_1=1\text{m/s}$ , and  $\mu=0.188P_a s$ )

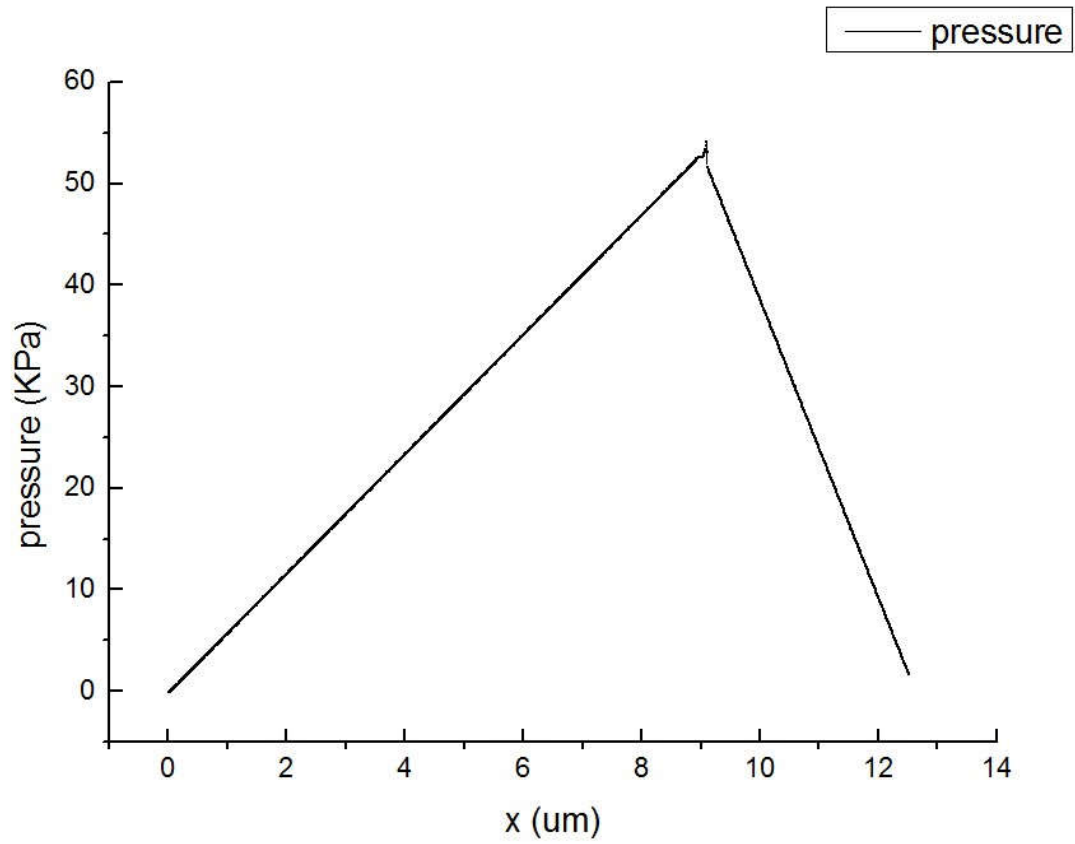

FIGURE 2: FLUENT results of pressure distributions on upper surfaces corresponding to the result of Figure 2(b), finding the similar pressure distributions.

(  $h_1=250\mu\text{m}$ ,  $L=12.5\text{mm}$ ,  $h_2=133.976\mu\text{m}$ ,  $l_1=8.975\text{mm}$ ,  $U_1=1\text{m/s}$ , and  $\mu = 0.188P_a s$  )

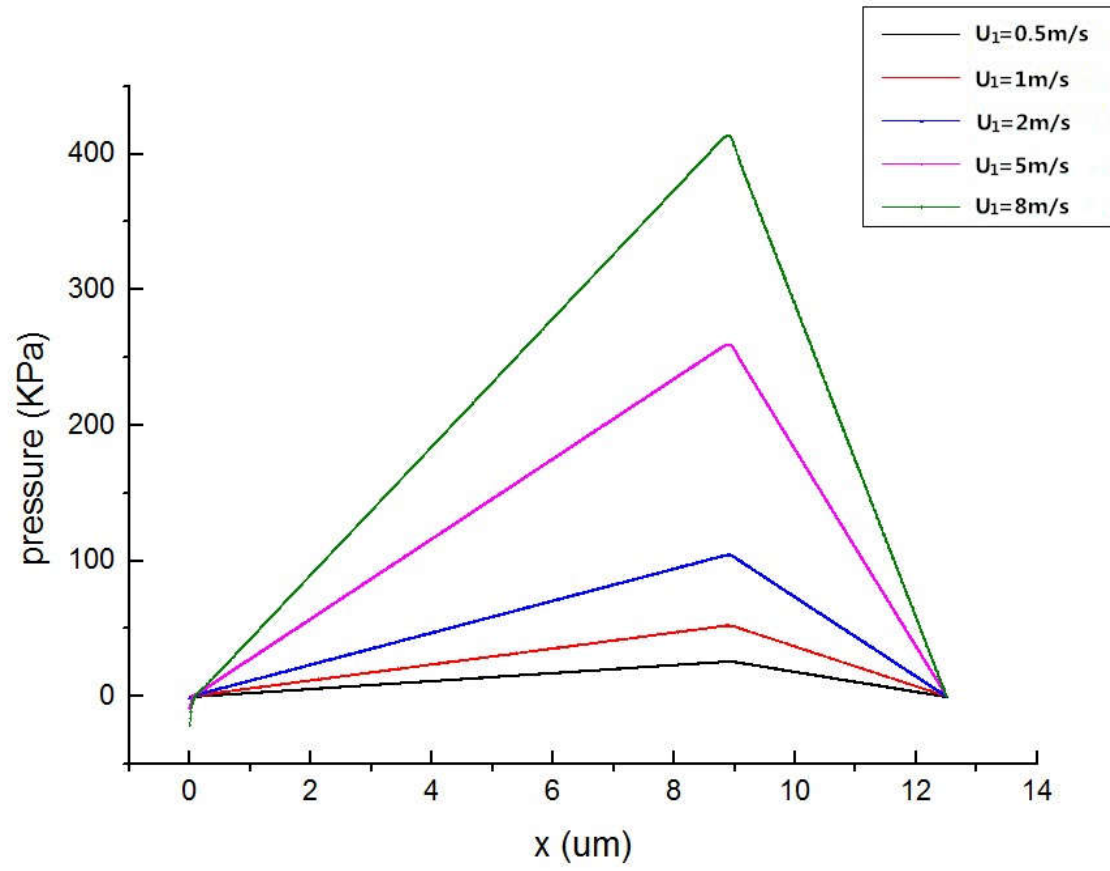

FIGURE 3: FLUENT results of lower surface pressures of different  $U_1$  values corresponding to the result of Figure 8, finding the same pressure distributions.

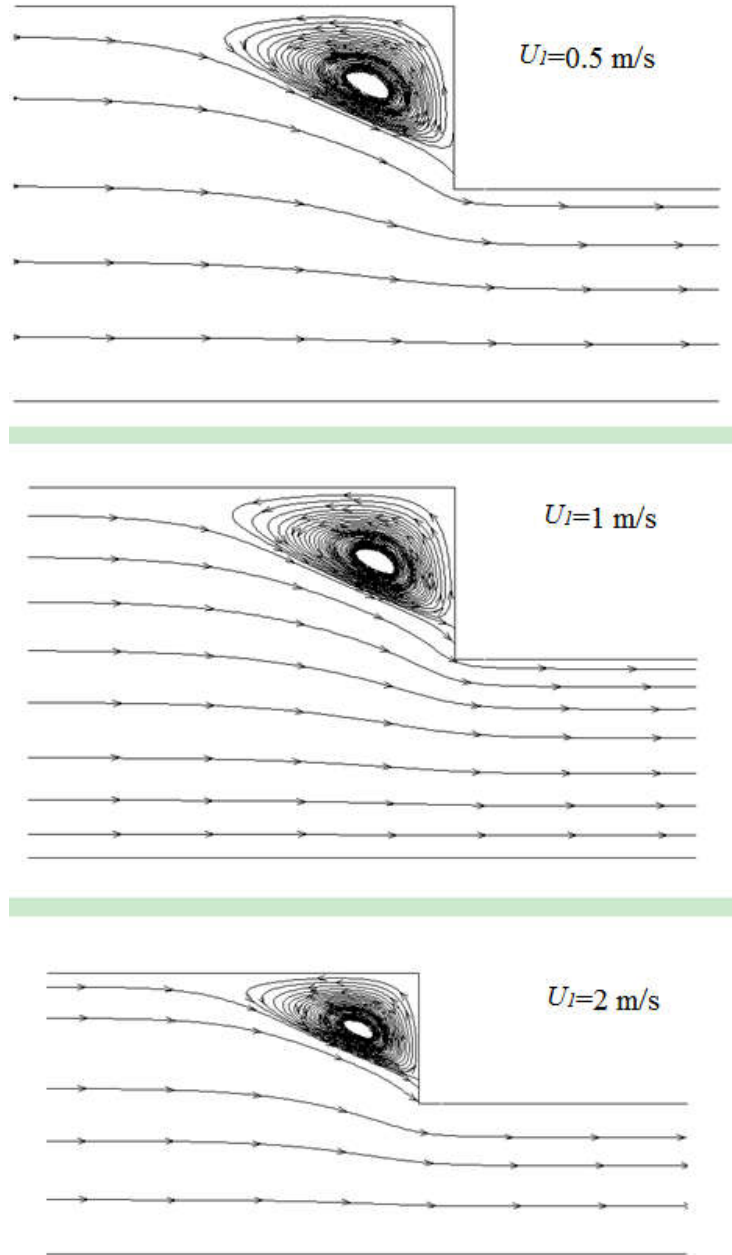

FIGURE 4: Streamlines of a step structure with  $\varepsilon=0.718$  and  $\xi=1.866$  at different  $U_1$  values corresponding to Figure 6(a), finding the similar phenomena.
